# Supplementary material for: Spontaneous formation of polymer nanoparticles with inner micro-phase separation structures
Source: Royal Society of Chemistry journal article supplement (doi:10.1039/b800904j), 2008-01-01
Supplement: b800904j.pdf [file b800904j.pdf]

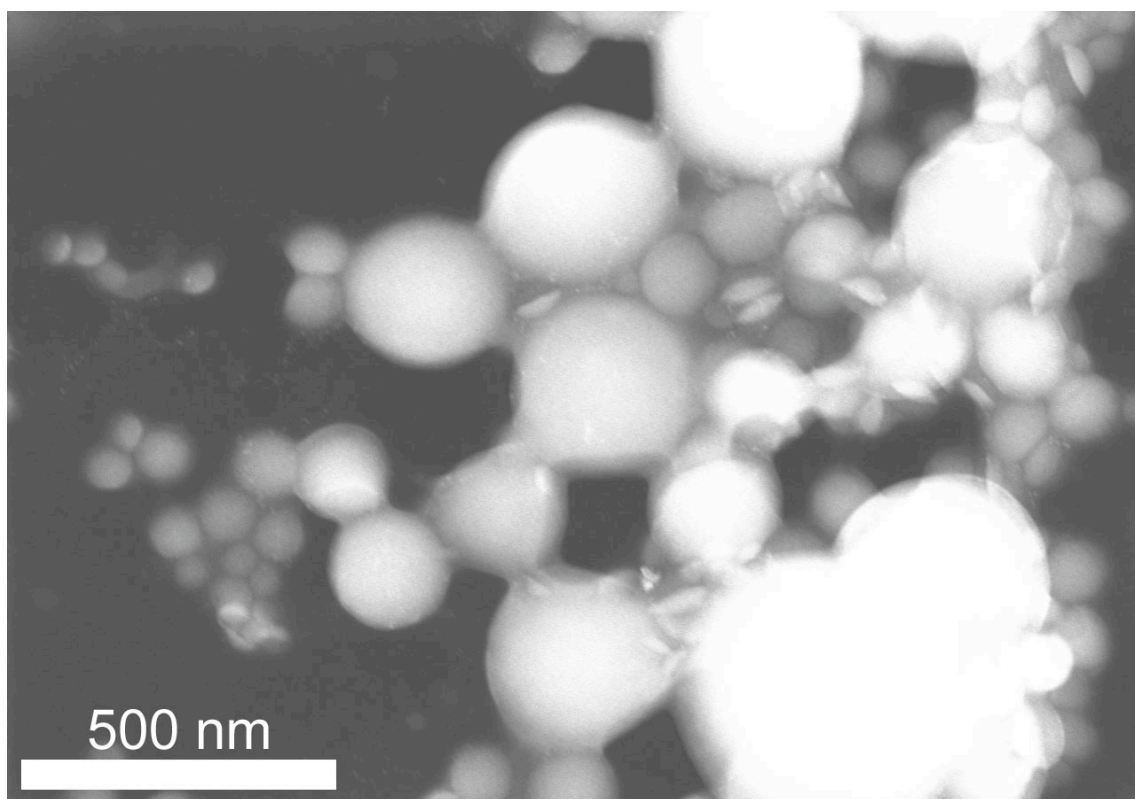

S-1. STEM image (dark field TEM mode) of the nanoparticles containing PSt and PI prepared by reprecipitation method.
